# Supplementary material for: The representation of facial emotion expands from sensory to prefrontal cortex with development
Source: eLife. 2026 Jan 30;14:RP107636. doi: 10.7554/eLife.107636 (PMC12858165; doi:10.7554/eLife.107636)
Supplement: Figure 2—source data 1. [file elife-107636-fig2-data1.xlsx]

## Sheet: Figure 2B
childhood	post-childhood
0.165	0.218
-0.16	0.043
0.054	0.405
-0.14	0.006
0.003	0.005
0.024	-0.03
-0.06	0.124
0.008	-0.06
	0.206
	0.448
	0.269
	0.029
	0.082

## Sheet: Figure 2C
childhood	post-childhood
0.169	0.157
0.008	0.11
0.049	0.199
-0.05	0.007
-0.04	-0.01
0.069	0.005
0.039	0.045
0.041	0.003
	0.155
	0.39
	0.261
	0.013
	0

## Sheet: Figure 2D
childhood	post-childhood
-0.00456495	0.0614514
-0.166921	-0.0666029
0.00511859	0.205715
-0.0902223	-0.00113459
0.042131	0.014158
-0.0449508	-0.0309867
-0.101898	0.0783071
-0.0325938	-0.0598524
	0.0510587
	0.0579151
	0.00793976
	0.0158378
	0.0867059
