# Supplementary material for: The representation of facial emotion expands from sensory to prefrontal cortex with development
Source: eLife. 2026 Jan 30;14:RP107636. doi: 10.7554/eLife.107636 (PMC12858165; doi:10.7554/eLife.107636)
Supplement: Figure 3—source data 1. [file elife-107636-fig3-data1.xlsx]

## Sheet: Figure 3B
speech	music
0.195	0.1674
0.15	0.0574
0.141	0.0713
0.12	0.1457

## Sheet: Figure 3C
DLPFC	DLPFC	pSTC	pSTC
Speech	Music	Speech	Music
-0.06	0.039	0.1951	0.1674

## Sheet: Figure 3E
speech	music
0.182	0.001
0.201	0.126
0.532	0.361
0.011	-0.06
0.009	0.055
0.073	0.212
0.055	0.045
0.024	0.02
0.084	-0.0001
0.065	0.023
0.359	0.323
0.018	-0.01
0.073	0.035
0.177	0.157
0.416	0.458
0.404	0.063
0.176	0.033
0.56	0.493
0.01	-0.01
0.058	0.099
0.253	0.059
-0.01	0.056
0.105	-0.09
0.061	0.027
0.016	-0.04
