# Supplementary material for: The representation of facial emotion expands from sensory to prefrontal cortex with development
Source: eLife. 2026 Jan 30;14:RP107636. doi: 10.7554/eLife.107636 (PMC12858165; doi:10.7554/eLife.107636)
Supplement: Figure 4—source data 1. [file elife-107636-fig4-data1.xlsx]

## Sheet: Figure 4A
complex emotion			basic emotion
age	weights		age	weights
55	0.182958		55	0.068123
33	0.07117		33	0.078881
33	0.123		33	0.123925
47	0.16973		47	0.077271
21	0.041251		21	0.070503
51	0.205171		51	0.088516
49	0.248442		49	0.194698
19	0.105194		19	0.055013
18	0.083591		18	0.137386
23	0.131073		23	0.058571
8	0.064454		8	0.06088
5	0.056244		5	0.047812

## Sheet: Figure 4B
Embarrassment	0.766586
Pride	0.677258
Guilt	0.642109
Interest	0.637629
Envy	0.540846
Confusion	0.505561
Triumph	0.466053
Joy	0.43128
Adoration	0.409791
Surprise (positive)	0.389089
Relief	0.385974
Calmness	0.37334
Disgust	0.367149
Fear	0.366763
Satisfaction	0.362068
Nostalgia	0.342313
Ecstasy	0.281964
Distress	0.281559
Sympathy	0.23831
Desire	0.23263
Contemplation	0.226675
Awkwardness	0.200292
Tiredness	0.191435
Boredom	0.186408
Love	0.159867
Admiration	0.157238
Excitement	0.154408
Craving	0.144949
Anxiety	0.139955
Pain	0.136571
Determination	0.082909
Anger	0.064461
Surprise (negative)	0.059863
Awe	0.046711
Aesthetic Appreciation	0.042596
Empathic Pain	0.032645
Horror	0.028895
Amusement	0.015693
Disappointment	-0.035553
Realization	-0.049693
Romance	-0.054664
Contentment	-0.09776
Concentration	-0.119807
Contempt	-0.125579
Entrancement	-0.16371
Shame	-0.306867
Sadness	-0.357294
Doubt	-0.386486

## Sheet: Figure 4C
Embarrassment			Pride			Guilt			Interest
age	weights		age	weights		age	weights		age	weights
55	0.141952		55	0.28383		55	0.063839		55	0.20696
33	0.00981481		33	0.005475		33	0.032021		33	0.01753
33	0.131117		33	0.09834		33	0.134741		33	0.215872
47	0.141174		47	0.197248		47	0.198122		47	0.133503
21	0.00458836		21	0.026128		21	0.091666		21	0.076695
51	0.240544		51	0.143609		51	0.094307		51	0.056412
49	0.153627		49	0.414299		49	0.173531		49	0.280755
19	0.104535		19	0.104774		19	0.015962		19	0.013473
18	0.0371467		18	0.007411		18	0.092885		18	0.086721
23	0.0385999		23	0.131588		23	0.066649		23	0.079423
8	0.0368071		8	0.085634		8	0.003185		8	0.024439
5	0.0337435		5	0.072593		5	0.012234		5	0.033748
